# Supplementary material for: Heterologous gene expression system for the production of hydrolyzable tannin intermediates in herbaceous model plants
Source: PubMed Central journal article supplement (PMC10587339; doi:10.1007/s10265-023-01484-2), 2023-08-01
Supplement: 10265_2023_1484_MOESM1_ESM.pdf [file 10265_2023_1484_MOESM1_ESM.pdf]

## Heterologous gene expression system for the production of hydrolyzable tannin intermediates in herbaceous model plants

Chihiro Oda-Yamamizo, Nobutaka Mitsuda, Carsten Milkowski, Hideyuki Ito, Kentaro Ezura, Ko Tahara

Corresponding author: Ko Tahara; Department of Forest Molecular Genetics and Biotechnology, Forestry and Forest Products Research Institute, 1 Matsunosato, Tsukuba, Ibaraki 305-8687, Japan; e-mail, taharako@affrc.go.jp

Table S1 Accession numbers of DQD/SDHs shown in Fig. 2

Table S2 Accession numbers of UGT84As and UGT72s shown in Fig. S1

Table S3 Orders, families, and genera in which hydrolyzable tannins were reportedly identified

Table S4 PCR primers used for subcloning and the quantitative real-time PCR analysis

Table S5  $\beta$ -Glucogallin and related compounds identified and quantified by UPLC-Q-TOF-MS

Fig. S1 Phylogenetic analysis of UGT84As and UGT72s from *Nicotiana benthamiana* and *Arabidopsis thaliana* and their family members functionally characterized in seed plants.

Fig. S2 Distribution of hydrolyzable tannins (HTs) in flowering plants.

Fig. S3 Harmful effects of the long-term incubation of *N. benthamiana*.

Fig. S4 Product ion spectra of gallic acid,  $\beta$ -glucogallin, 3-glucogallic acid, and 4-glucogallic acid.

References

**Table S1** Accession numbers of DQD/SDHs shown in Fig. 2

| Species                              | Protein name      | Accession              | Reference                  |
|--------------------------------------|-------------------|------------------------|----------------------------|
| <i>Arabidopsis thaliana</i> (At)     | DQD/SDH           | AT3G06350              | Singh and Christendat 2006 |
| <i>Camellia sinensis</i> (Cs)        | DQD/SDHa          | AYP64306               | Huang et al. 2019          |
| <i>Camellia sinensis</i> (Cs)        | DQD/SDHb          | AYP64307               | Huang et al. 2019          |
| <i>Camellia sinensis</i> (Cs)        | DQD/SDHc          | AYP64308               | Huang et al. 2019          |
| <i>Camellia sinensis</i> (Cs)        | DQD/SDHd          | AYP64309               | Huang et al. 2019          |
| <i>Eucalyptus camaldulensis</i> (Ec) | DQD/SDH1          | BBL52470               | Tahara et al. 2021         |
| <i>Eucalyptus camaldulensis</i> (Ec) | DQD/SDH2          | BBL52471               | Tahara et al. 2021         |
| <i>Eucalyptus camaldulensis</i> (Ec) | DQD/SDH3          | BBL52472               | Tahara et al. 2021         |
| <i>Eucalyptus camaldulensis</i> (Ec) | DQD/SDH4 (QDH)    | BBL52473               | Tahara et al. 2021         |
| <i>Juglans regia</i> (Jr)            | SDH               | AAW65140               | Muir et al. 2011           |
| <i>Nicotiana benthamiana</i> (Nb)    |                   | Niben101Scf00247g04007 | This study                 |
| <i>Nicotiana benthamiana</i> (Nb)    |                   | Niben101Scf01642g01015 | This study                 |
| <i>Nicotiana benthamiana</i> (Nb)    |                   | Niben101Scf01740g12012 | This study                 |
| <i>Nicotiana benthamiana</i> (Nb)    |                   | Niben101Scf02709g04001 | This study                 |
| <i>Nicotiana benthamiana</i> (Nb)    |                   | Niben101Scf04146g01023 | This study                 |
| <i>Nicotiana benthamiana</i> (Nb)    |                   | Niben101Scf04216g05005 | This study                 |
| <i>Nicotiana benthamiana</i> (Nb)    |                   | Niben101Scf06613g05001 | This study                 |
| <i>Nicotiana tabacum</i> (Nt)        | DQD/SDH1          | AAS90325               | Ding et al. 2007           |
| <i>Nicotiana tabacum</i> (Nt)        | DQD/SDH2          | AAS90324               | Ding et al. 2007           |
| <i>Pinus taeda</i> (Pit)             | SDH               |                        | Carrington et al. 2018     |
| <i>Pinus taeda</i> (Pit)             | QDH               |                        | Carrington et al. 2018     |
| <i>Populus trichocarpa</i> (Pot)     | DQD/SDH1 (Poptr1) | Potri.010G019000.2     | Guo et al. 2014            |
| <i>Populus trichocarpa</i> (Pot)     | DQD/SDH2 (Poptr5) | Potri.013G029800.1     | Guo et al. 2014            |
| <i>Populus trichocarpa</i> (Pot)     | QDH1 (Poptr2)     | Potri.013G029900.2     | Guo et al. 2014            |
| <i>Populus trichocarpa</i> (Pot)     | QDH2 (Poptr3)     | Potri.005G043400.1     | Guo et al. 2014            |
| <i>Populus trichocarpa</i> (Pot)     | QDH3 (Poptr4)     | Potri.014G135500.3     | Guo et al. 2014            |
| <i>Solanum lycopersicum</i> (Sl)     | DQD/SDH1          | AAC17991               | Bischoff et al. 2001       |
| <i>Solanum lycopersicum</i> (Sl)     | QDH               | Solyc10g038080.1.1     | Gritsunov et al. 2018      |
| <i>Vitis vinifera</i> (Vv)           | SDH1              | KU163040               | Bontpart et al. 2016       |
| <i>Vitis vinifera</i> (Vv)           | SDH2              | KU163041               | Bontpart et al. 2016       |
| <i>Vitis vinifera</i> (Vv)           | SDH3              | KU163042               | Bontpart et al. 2016       |
| <i>Vitis vinifera</i> (At)           | SDH4              | KU163043               | Bontpart et al. 2016       |

**Table S2** Accession numbers of UGT84As and UGT72s shown in Fig. S1.

| Species                              | Protein name     | Accession             | Reference               |
|--------------------------------------|------------------|-----------------------|-------------------------|
| <i>Arabidopsis thaliana</i> (At)     | UGT72B1          | AT4G01070             | Yang et al. 2018        |
| <i>Arabidopsis thaliana</i> (At)     | UGT72B2          | AT1G01390             | This study              |
| <i>Arabidopsis thaliana</i> (At)     | UGT72B3          | AT1G01420             | Yang et al. 2018        |
| <i>Arabidopsis thaliana</i> (At)     | UGT72C1          | AT4G36770             | Yang et al. 2018        |
| <i>Arabidopsis thaliana</i> (At)     | UGT72D1          | AT2G18570             | Yang et al. 2018        |
| <i>Arabidopsis thaliana</i> (At)     | UGT72D2          | AT2G18560             | This study              |
| <i>Arabidopsis thaliana</i> (At)     | UGT72E1          | AT3G50740             | Yang et al. 2018        |
| <i>Arabidopsis thaliana</i> (At)     | UGT72E2          | AT5G66690             | Yang et al. 2018        |
| <i>Arabidopsis thaliana</i> (At)     | UGT72E3          | AT5G26310             | Yang et al. 2018        |
| <i>Arabidopsis thaliana</i> (At)     | UGT84A1          | AT4G15480             | Milkowski et al. 2000b  |
| <i>Arabidopsis thaliana</i> (At)     | UGT84A2          | AT3G21560             | Milkowski et al. 2000b  |
| <i>Arabidopsis thaliana</i> (At)     | UGT84A3          | AT4G15490             | Milkowski et al. 2000b  |
| <i>Arabidopsis thaliana</i> (At)     | UGT84A4          | AT4G15500             | Milkowski et al. 2000b  |
| <i>Brassica napus</i> (Bn)           | UGT84A9          | AAF98390              | Milkowski et al. 2000a  |
| <i>Brassica napus</i> (Bn)           | UGT84A10         | CAJ77650              | Mittasch et al. 2007    |
| <i>Camellia sinensis</i> (Cs)        | UGT72AM1         | ASA40331              | Zhao et al. 2017        |
| <i>Camellia sinensis</i> (Cs)        | UGT84A22         | ALO19890              | Cui et al. 2016         |
| <i>Citrus unshiu</i> (Cu)            | CitLGT (UGT84A5) | BAA93039              | Kita et al. 2000        |
| <i>Eucalyptus camaldulensis</i> (Ec) | UGT84A25         | BBB21213              | Tahara et al. 2018      |
| <i>Eucalyptus camaldulensis</i> (Ec) | UGT84A26         | BBB21215              | Tahara et al. 2018      |
| <i>Fragaria × ananassa</i> (Fa)      | FaGT2 (UGT84A6)  | AAU09443              | Schulenburg et al. 2016 |
| <i>Gentiana trifloral</i> (Gt)       | GtUF6CGT1        | BAQ19550              | Sasaki et al. 2015      |
| <i>Glycine max</i> (Gm)              | UGT72X4          | Glyma.08G338100       | Yin et al. 2017b        |
| <i>Glycine max</i> (Gm)              | UGT72Z3          | Glyma.08G338200       | Yin et al. 2017b        |
| <i>Hieracium pilosella</i> (Hp)      | UGT72B11         | ACB56923              | Witte et al. 2009       |
| <i>Lotus japonicus</i> (Lj)          | UGT72V3          | chr3.CM0282.950.r2.m  | Yin et al. 2017a        |
| <i>Lotus japonicus</i> (Lj)          | UGT72Z2          | LjSGA_016571          | Yin et al. 2017a        |
| <i>Lotus japonicus</i> (Lj)          | UGT72AD1         | chr1.LjT10H09.40.r2.m | Yin et al. 2017a        |
| <i>Lotus japonicus</i> (Lj)          | UGT72AF1         | chr6.CM0118.1240.r2.d | Yin et al. 2017a        |
| <i>Lotus japonicus</i> (Lj)          | UGT72AH1         | chr3.CM0846.120.r2.d  | Yin et al. 2017a        |
| <i>Medicago truncatula</i> (Mt)      | UGT72L1          | ACC38470              | Pang et al. 2008        |
| <i>Nicotiana benthamiana</i> (Nb)    | UGT72B34         | UHH90499              | Sun et al. 2019         |
| <i>Nicotiana benthamiana</i> (Nb)    | UGT72B35         | UHH90500              | Sun et al. 2019         |
| <i>Nicotiana benthamiana</i> (Nb)    | UGT72AX1         | UHH90503              | Sun et al. 2019         |
| <i>Nicotiana benthamiana</i> (Nb)    | UGT72AY1         | UHH90560              | Sun et al. 2019         |

|                                                            |          |                        |                        |
|------------------------------------------------------------|----------|------------------------|------------------------|
| <i>Nicotiana benthamiana</i> (Nb)                          |          | Niben101Scf00817g06013 | This study             |
| <i>Nicotiana benthamiana</i> (Nb)                          |          | Niben101Scf01341g00002 | This study             |
| <i>Nicotiana benthamiana</i> (Nb)                          |          | Niben101Scf02565g03002 | This study             |
| <i>Nicotiana benthamiana</i> (Nb)                          |          | Niben101Scf03434g01013 | This study             |
| <i>Nicotiana benthamiana</i> (Nb)                          |          | Niben101Scf04240g00006 | This study             |
| <i>Nicotiana benthamiana</i> (Nb)                          |          | Niben101Scf07353g02006 | This study             |
| <i>Nicotiana benthamiana</i> (Nb)                          |          | Niben101Scf13710g02002 | This study             |
| <i>Populus fremontii</i><br>× <i>P. angustifolia</i> (Pfa) | UGT84A17 | AII32448               | Babst et al. 2014      |
| <i>Populus tremula</i> × <i>P. alba</i> (Pta)              | UGT72B37 | QLI54353               | Speeckaert et al. 2020 |
| <i>Populus tremula</i> × <i>P. alba</i> (Pta)              | UGT72B39 | QLI54355               | Speeckaert et al. 2020 |
| <i>Populus tremula</i> × <i>P. alba</i> (Pta)              | UGT72AZ2 | QLI54351               | Speeckaert et al. 2020 |
| <i>Punica granatum</i> (Pg)                                | UGT72BD1 | QHB92369               | Chang et al. 2019      |
| <i>Punica granatum</i> (Pg)                                | UGT84A23 | ANN02875               | Ono et al. 2016        |
| <i>Punica granatum</i> (Pg)                                | UGT84A24 | ANN02877               | Ono et al. 2016        |
| <i>Quercus robur</i> (Qr)                                  | UGT84A13 | AHA54051               | Mittasch et al. 2014   |
| <i>Solanum lycopersicum</i> (Sl)                           | SIUGT5   | ADI33725               | Louveau et al. 2011    |
| <i>Vitis labrusca</i> (Vl)                                 | VIRSGt   | ABH03018               | Hall and De Luca 2007  |
| <i>Vitis vinifera</i> (Vv)                                 | UGT72B27 | QZP12103               | Härtl et al. 2017      |
| <i>Vitis vinifera</i> (Vv)                                 | VvgGT1   | AEW31187               | Khater et al. 2012     |

---

**Table S3** Orders, families, and genera in which hydrolyzable tannins were reportedly identified

| Order           | Family            | Genus                                                                                          |
|-----------------|-------------------|------------------------------------------------------------------------------------------------|
| Nymphaeales     | Nymphaeaceae      | <i>Nuphar</i>                                                                                  |
| Gunnerales      | Myrothamnaceae    | <i>Myrothamnus</i> <sup>1</sup>                                                                |
| Fabales         | Fabaceae          | <i>Caesalpinia, Ceratonia, Haematoxylum</i>                                                    |
| Rosales         | Elaeagnaceae      | <i>Elaeagnus, Hippophae, Shepherdia</i>                                                        |
|                 | Rosaceae          | <i>Agrimonia, Filipendula, Fragaria, Geum, Rosa, Rubus, Potentilla, Sanguisorba, Sieversia</i> |
| Fagales         | Betulaceae        | <i>Alnus, Carpinus, Corylus</i>                                                                |
|                 | Casuarinaceae     | <i>Casuarina</i>                                                                               |
|                 | Fagaceae          | <i>Castanea, Castanopsis, Quercus</i>                                                          |
|                 | Juglandaceae      | <i>Juglans, Rhoiptelea</i>                                                                     |
| Cucurbitales    | Coriariaceae      | <i>Coriaria</i>                                                                                |
| Oxalidales      | Elaeocarpaceae    | <i>Elaeocarpus</i>                                                                             |
| Malpighiales    | Euphorbiaceae     | <i>Alchornea, Aleurites, Euphorbia, Excoecaria, Macaranga, Mallotus</i>                        |
|                 | Phyllanthaceae    | <i>Antidesma, Phyllanthus</i>                                                                  |
| Geraniales      | Geraniaceae       | <i>Geranium</i>                                                                                |
| Myrtales        | Combretaceae      | <i>Anogeissus, Combretum, Terminalia</i>                                                       |
|                 | Lythraceae        | <i>Cuphea, Lagerstroemia, Punica, Trapa, Woodfordia</i>                                        |
|                 | Melastomataceae   | <i>Bredia, Heterocentron, Medinilla, Melastoma, Tibouchina</i>                                 |
|                 | Myrtaceae         | <i>Eucalyptus, Eugenia, Feijoa, Melaleuca, Psidium, Syzygium</i>                               |
|                 | Onagraceae        | <i>Epilobium, Fuchsia, Oenothera</i>                                                           |
| Crossosomatales | Stachyuraceae     | <i>Stachyurus</i>                                                                              |
| Malvales        | Cytinaceae        | <i>Cytinus</i>                                                                                 |
| Sapindales      | Aceraceae         | <i>Acer</i>                                                                                    |
|                 | Anacardiaceae     | <i>Cotinus, Mangifera, Rhus</i>                                                                |
| Vitales         | Vitaceae          | <i>Vitis</i>                                                                                   |
| Saxifragales    | Altingiaceae      | <i>Liquidambar</i>                                                                             |
|                 | Cercidiphyllaceae | <i>Cercidiphyllum</i>                                                                          |
|                 | Hamamelidaceae    | <i>Hamamelis, Loropetalum</i>                                                                  |
|                 | Paeoniaceae       | <i>Paeonia</i>                                                                                 |
|                 | Saxifragaceae     | <i>Bergenia, Tellima</i>                                                                       |
| Caryophyllales  | Polygonaceae      | <i>Rheum</i>                                                                                   |
|                 | Tamaricaceae      | <i>Reaumuria, Tamarix</i>                                                                      |
| Cornales        | Cornaceae         | <i>Cornus</i>                                                                                  |
|                 | Nyssaceae         | <i>Camptotheca</i>                                                                             |
| Ericales        | Ericaceae         | <i>Arctostaphylos, Pyrola</i>                                                                  |
|                 | Lecythidaceae     | <i>Barringtonia</i>                                                                            |
|                 | Theaceae          | <i>Camellia, Gordonia, Schima</i>                                                              |

Hydrolyzable tannin-containing genera reviewed by Okuda et al. (2000) were revised according to APG IV unless otherwise noted. <sup>1</sup>Engelhardt et al. (2016) reported the presence of hydrolyzable tannins in this genus.

**Table S4** PCR primers used for subcloning and the quantitative real-time PCR analysis

| Purpose                          | Gene              | Forward or reverse    | Sequence (5'–3')                     |
|----------------------------------|-------------------|-----------------------|--------------------------------------|
| Subcloning                       | <i>EcDQD/SDH2</i> | Fw                    | tacaattacagatcccATGACTCTCAGCAGCATCC  |
|                                  |                   | Rev                   | gtcgtacccccgggACTGTTCTTCACCAATGTAT   |
|                                  | <i>EcDQD/SDH3</i> | Fw                    | gctgtcgacccccgggATGGGCAGCGTTCCGTTTAC |
|                                  |                   | Rev                   | gacttatctagtaccTGCATGTTTCTCCATGAG    |
|                                  | <i>UGT84A25</i>   | Fw                    | ttacaattacagatcccATGGGGTCGGAGGCGCTC  |
|                                  |                   | Rev                   | gtcgtacccccgggCGACACTACCTTCAGCTCCC   |
|                                  | <i>UGT84A26</i>   | Fw                    | gctgtcgacccccgggATGGGGTCGGAGGCACTTGT |
|                                  |                   | Rev                   | ctcgtcgacgggtacccccCGACACCACCTTTAACT |
| Real-time PCR                    | <i>EcDQD/SDH2</i> | Fw                    | TGCCATCTACACGCCAAAATTG               |
|                                  |                   | Rev                   | CAGTTGCTTTGGTGCAGGATAC               |
|                                  | <i>EcDQD/SDH3</i> | Fw                    | ATGCCATTTACACACCAAAGGAC              |
|                                  |                   | Rev                   | GTCCTGAACAATTCCTCCGGG                |
|                                  | <i>UGT84A25</i>   | Fw                    | AGAACGCGATGAAGTGGAGC                 |
|                                  |                   | Rev                   | GCCATTGGCCGTTGACTTGC                 |
|                                  | <i>UGT84A26</i>   | Fw                    | TCCTCAGACCGGAACATCCAG                |
|                                  |                   | Rev                   | CCATTGCCCGCCACTTTGTTG                |
| <i>NbEF-1<math>\alpha</math></i> | Fw                | AGCTTTACCTCCCAAGTCATC |                                      |
|                                  | Rev               | CAGAACGCCTGTCAATCTTGG |                                      |

**Table S5**  $\beta$ -Glucogallin and related compounds identified and quantified by UPLC-Q-TOF-MS

| Compound               | Retention time (min) | Elemental composition                           | Measured ion       | Calculated exact mass | Measured accurate mass | Error (ppm) |
|------------------------|----------------------|-------------------------------------------------|--------------------|-----------------------|------------------------|-------------|
| Quinic acid            | 0.66                 | C <sub>7</sub> H <sub>12</sub> O <sub>6</sub>   | [M-H] <sup>-</sup> | 192.0634              | 192.0653               | 9.8         |
| Shikimic acid          | 0.83                 | C <sub>7</sub> H <sub>10</sub> O <sub>5</sub>   | [M-H] <sup>-</sup> | 174.0528              | 174.0531               | 1.6         |
| 3-Dehydroshikimic acid | 1.02                 | C <sub>7</sub> H <sub>8</sub> O <sub>5</sub>    | [M-H] <sup>-</sup> | 172.0371              | 172.0381               | 5.3         |
| $\beta$ -Glucogallin   | 2.26                 | C <sub>13</sub> H <sub>16</sub> O <sub>10</sub> | [M-H] <sup>-</sup> | 332.0744              | 332.0761               | 5.2         |
| Gallic acid            | 2.29                 | C <sub>7</sub> H <sub>6</sub> O <sub>5</sub>    | [M-H] <sup>-</sup> | 170.0215              | 170.0240               | 14.7        |
| 3-Glucogallic acid     | 2.64                 | C <sub>13</sub> H <sub>16</sub> O <sub>10</sub> | [M-H] <sup>-</sup> | 332.0744              | 332.0755               | 3.5         |
| 4-Glucogallic acid     | 3.75                 | C <sub>13</sub> H <sub>16</sub> O <sub>10</sub> | [M-H] <sup>-</sup> | 332.0744              | 332.0768               | 7.5         |

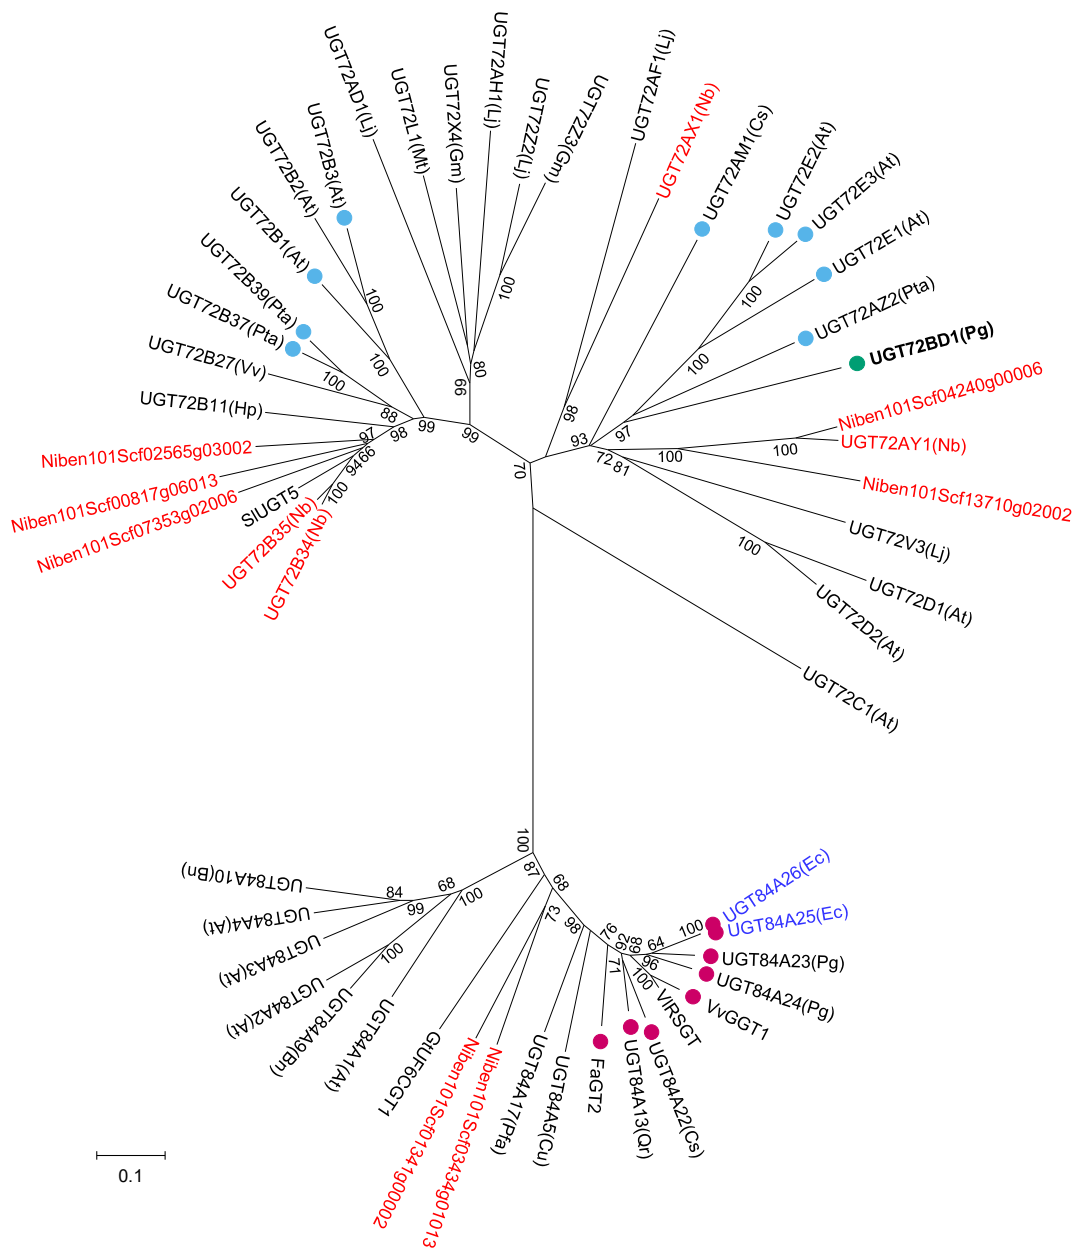

**Fig. S1** Phylogenetic analysis of UGT84As and UGT72s from *Nicotiana benthamiana* and *Arabidopsis thaliana*, and their family members functionally characterized in seed plants. The phylogenetic tree was constructed based on an alignment of multiple full-length protein sequences according to the neighbor-joining method. The scale bar represents 0.1 fixed mutations per site. Bootstrap values (1,000 replicates) greater than 60% are indicated. The accession numbers of the UGTs are listed in Table S2. The UGTs from *N. benthamiana* and *Eucalyptus camaldulensis* are highlighted in red and blue letters, respectively. Magenta, green and blue dots indicate enzymes with activities of the formation of  $\beta$ -glucogallin, 4-glucogallic acid, and phenylpropanoid 4-*O*-glucoside, respectively.



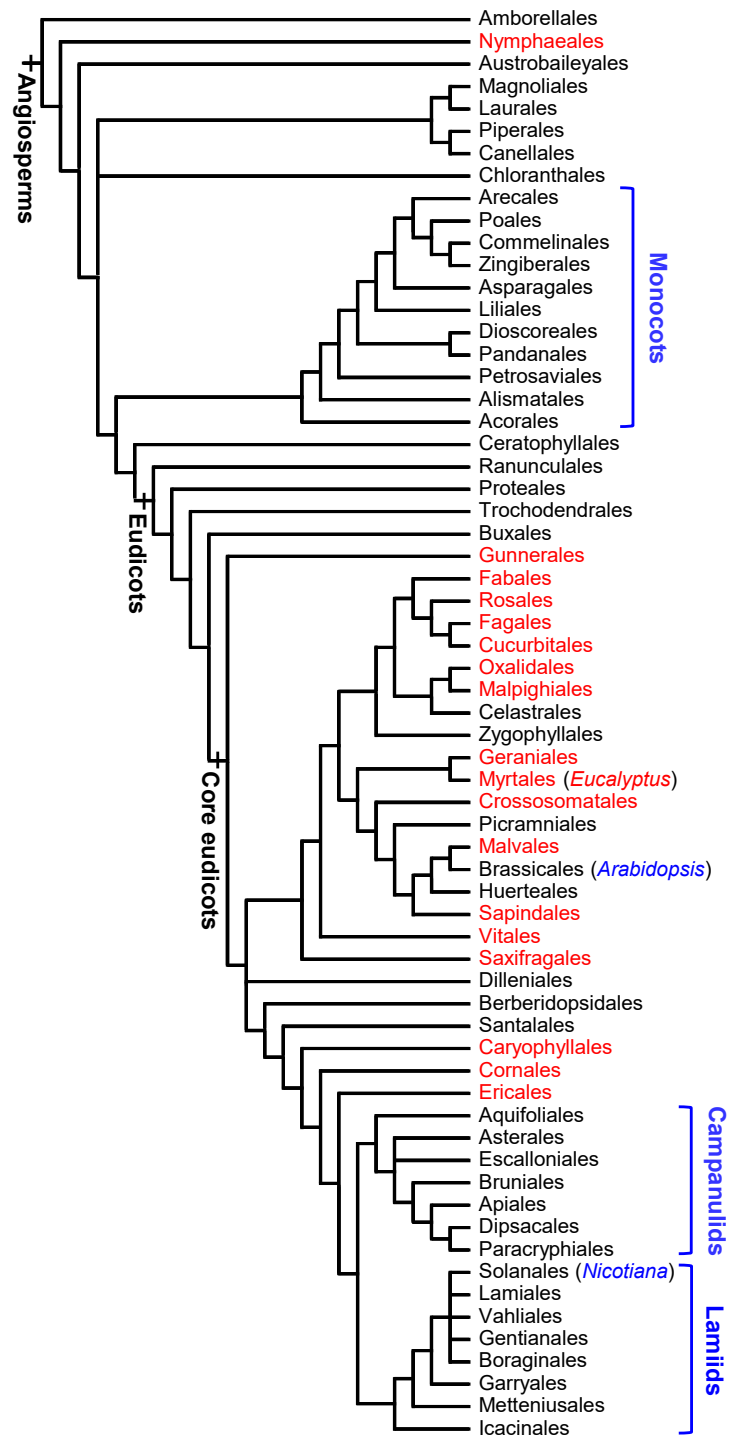

**Fig. S2** Distribution of hydrolyzable tannins (HTs) in flowering plants. Orders in which HTs were reportedly identified are indicated in red in the phylogenetic tree constructed based on the Angiosperm Phylogeny Group classification (APG IV). Families and genera in which HTs were reportedly identified are listed in Table S3.

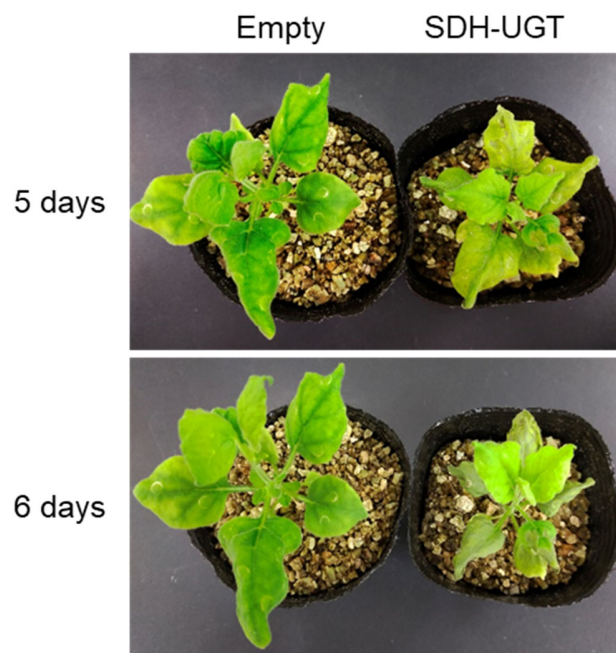

**Fig. S3** Harmful effects of the long-term incubation of *N. benthamiana*. The *N. benthamiana* plants infiltrated with *A. tumefaciens* harboring the empty vector or the SDH-UGT vector are presented.

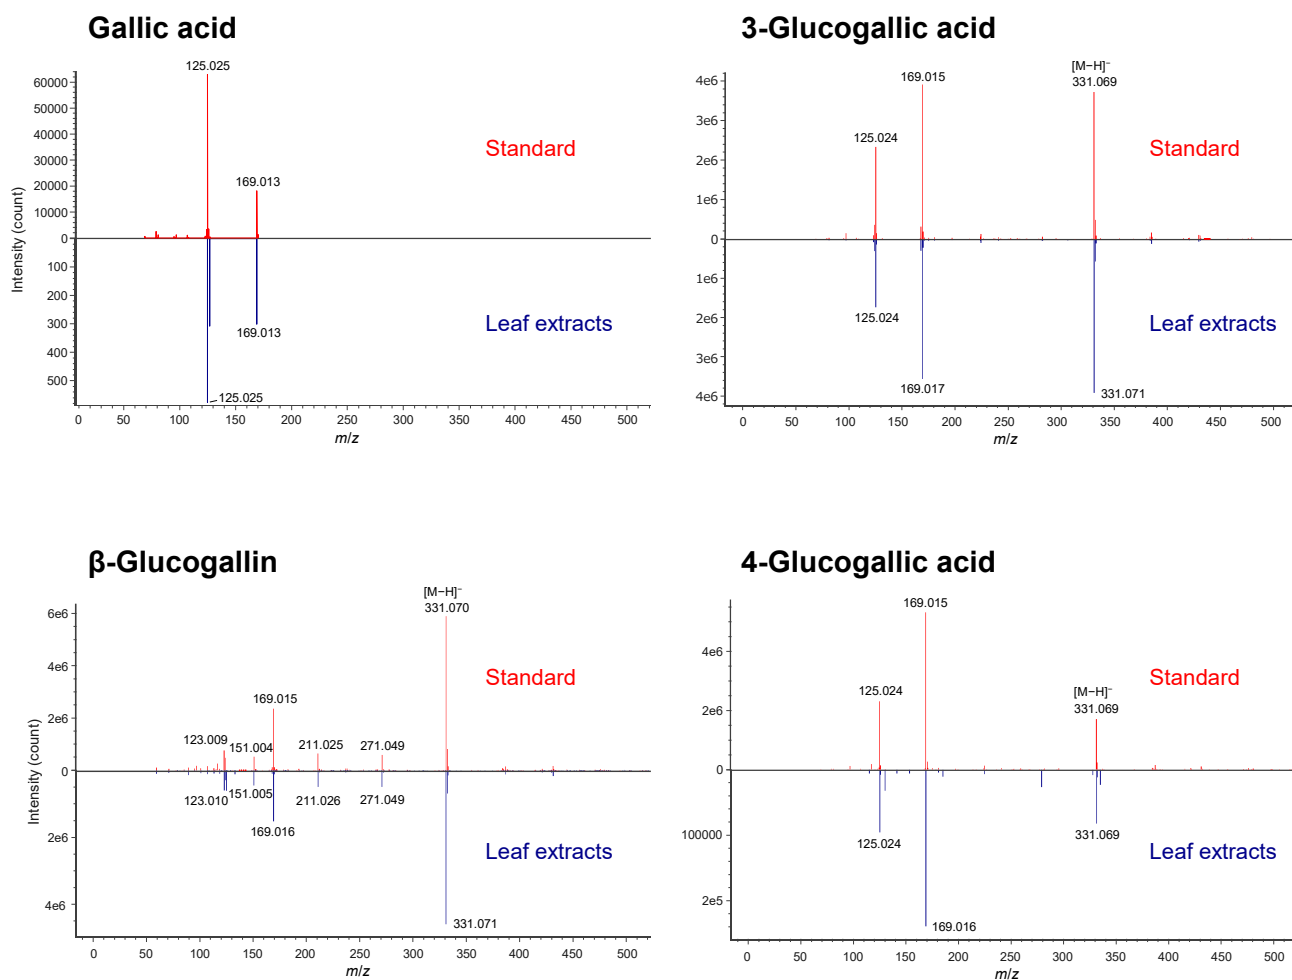

**Fig. S4** Product ion spectra of gallic acid,  $\beta$ -glucogallin, 3-glucogallic acid, and 4-glucogallic acid. Product ion spectra were acquired at high collision energies (10–45 eV) using the UPLC-Q-TOF-MS system and then compared between authentic standards and leaf extracts.

## References

- Babst BA, Chen HY, Wang HQ, Payyavula RS, Thomas TP, Harding SA, Tsai CJ (2014) Stress-responsive hydroxycinnamate glycosyltransferase modulates phenylpropanoid metabolism in *Populus*. *J Exp Bot* 65:4191–4200. <https://doi.org/10.1093/jxb/eru192>
- Bischoff M, Schaller A, Bieri F, Kessler F, Amrhein N, Schmid J (2001) Molecular characterization of tomato 3-dehydroquinate dehydratase-shikimate:NADP oxidoreductase. *Plant Physiol* 125:1891–1900. <https://doi.org/10.1104/pp.125.4.1891>
- Bontpart T, Marlin T, Vialet S, Guiraud JL, Pinasseau L, Meudec E, Sommerer N, Cheynier V, Terrier N (2016) Two shikimate dehydrogenases, VvSDH3 and VvSDH4, are involved in gallic acid biosynthesis in grapevine. *J Exp Bot* 67:3537–3550. <https://doi.org/10.1093/jxb/erw184>
- Carrington Y, Guo J, Le CH, Fillo A, Kwon J, Tran LT, Ehrling J (2018) Evolution of a secondary metabolic pathway from primary metabolism: shikimate and quinate biosynthesis in plants. *Plant J* 95:823–833. <https://doi.org/10.1111/tpj.13990>
- Chang L, Wu S, Tian L (2019) Effective genome editing and identification of a regiospecific gallic acid 4-*O*-glycosyltransferase in pomegranate (*Punica granatum* L.). *Hort Res* 6:123. <https://doi.org/10.1038/s41438-019-0206-7>
- Cui L, Yao S, Dai X, Yin Q, Liu Y, Jiang X, Wu Y, Qian Y, Pang Y, Gao L, Xia T (2016) Identification of UDP-glycosyltransferases involved in the biosynthesis of astringent taste compounds in tea (*Camellia sinensis*). *J Exp Bot* 67:2285–2297. <https://doi.org/10.1093/jxb/erw053>
- Ding L, Hofius D, Hajirezaei M-R, Fernie AR, Börnke F, Sonnewald U (2007) Functional analysis of the essential bifunctional tobacco enzyme 3-dehydroquinate dehydratase/shikimate dehydrogenase in transgenic tobacco plants. *J Exp Bot* 58:2053–2067. <https://doi.org/10.1093/jxb/erm059>
- Engelhardt C, Peterleit F, Lechtenberg M, Liefländer-Wulf U, Hensel A (2016) Qualitative and quantitative phytochemical characterization of *Myrothamnus flabellifolia* Welw. *Fitoterapia* 114:69–80. <https://doi.org/10.1016/j.fitote.2016.08.013>
- Gritsunov A, Peek J, Caballero JD, Guttman D, Christendat D (2018) Structural and biochemical approaches uncover multiple evolutionary trajectories of plant quinate dehydrogenases. *Plant J* 95:812–822. <https://doi.org/10.1111/tpj.13989>
- Guo J, Carrington Y, Alber A, Ehrling J (2014) Molecular characterization of quinate and shikimate metabolism in *Populus trichocarpa*. *J Biol Chem* 289:23846–23858. <https://doi.org/10.1074/jbc.M114.558536>
- Hall D, De Luca V (2007) Mesocarp localization of a bi-functional resveratrol/hydroxycinnamic acid glucosyltransferase of Concord grape (*Vitis labrusca*). *Plant J* 49:579–591. <https://doi.org/10.1111/j.1365-3113.2006.02987.x>
- Härtl K, Huang FC, Giri AP, Franz-Oberdorf K, Frotscher J, Shao Y, Hoffmann T, Schwab W (2017) Glucosylation of smoke-derived volatiles in grapevine (*Vitis vinifera*) is catalyzed by a promiscuous resveratrol/guaiacol glucosyltransferase. *J Agric Food Chem* 65:5681–5689. <https://doi.org/10.1021/acs.jafc.7b01886>
- Khater F, Fournand D, Vialet S, Meudec E, Cheynier V, Terrier N (2012) Identification and functional characterization of cDNAs coding for hydroxybenzoate/hydroxycinnamate glucosyltransferases co-expressed with genes related to proanthocyanidin biosynthesis. *J Exp Bot* 63:1201–1214. <https://doi.org/10.1093/jxb/err340>
- Kita M, Hirata Y, Moriguchi T, Endo-Inagaki T, Matsumoto R, Hasegawa S, Suhayda CG, Omura M (2000) Molecular cloning and characterization of a novel gene encoding limonoid UDP-glucosyltransferase in *Citrus*. *FEBS Lett* 469:173–178. [https://doi.org/10.1016/S0014-5793\(00\)01275-8](https://doi.org/10.1016/S0014-5793(00)01275-8)
- Huang K, Li M, Liu Y, Zhu M, Zhao G, Zhou Y, Zhang L, Wu Y, Dai X, Xia T, Gao L (2019) Functional analysis of 3-dehydroquinate dehydratase/shikimate dehydrogenases involved in shikimate pathway in *Camellia sinensis*. *Front Plant Sci* 10:1268. <https://doi.org/10.3389/fpls.2019.01268>
- Louveau T, Leitao C, Green S, Hamiaux C, van der Rest B, Dechy-Cabaret O, Atkinson RG, Chervin C (2011) Predicting the substrate specificity of a glycosyltransferase implicated in the production of phenolic volatiles in tomato fruit. *FEBS J* 278:390–400. <https://doi.org/10.1111/j.1742-4658.2010.07962.x>
- Milkowski C, Baumert A, Strack D (2000a) Cloning and heterologous expression of a rape cDNA encoding UDP-glucose : sinapate glucosyltransferase. *Planta* 211:883–886. <https://doi.org/10.1007/s004250000411>
- Milkowski C, Baumert A, Strack D (2000b) Identification of four *Arabidopsis* genes encoding hydroxycinnamate glucosyltransferases. *FEBS Lett* 486:183–184. [https://doi.org/10.1016/S0014-5793\(00\)02270-5](https://doi.org/10.1016/S0014-5793(00)02270-5)
- Mittasch J, Böttcher C, Frolova N, Bönn M, Milkowski C (2014) Identification of UGT84A13 as a candidate enzyme

- for the first committed step of gallotannin biosynthesis in pedunculate oak (*Quercus robur*). *Phytochemistry* 99:44–51. <https://doi.org/10.1016/j.phytochem.2013.11.023>
- Mittasch J, Strack D, Milkowski C (2007) Secondary product glycosyltransferases in seeds of *Brassica napus*. *Planta* 225:515–522. <https://doi.org/10.1007/s00425-006-0360-7>
- Muir RM, Ibanez AM, Uratsu SL, Ingham ES, Leslie CA, McGranahan GH, Batra N, Goyal S, Joseph J, Jemmis ED, Dandekar AM (2011) Mechanism of gallic acid biosynthesis in bacteria (*Escherichia coli*) and walnut (*Juglans regia*). *Plant Mol Biol* 75:555–565. <https://doi.org/10.1007/s11103-011-9739-3>
- Okuda T, Yoshida T, Hatano T (2000) Correlation of oxidative transformations of hydrolysable tannins and plant evolution. *Phytochemistry* 55: 513–529. [https://doi.org/10.1016/S0031-9422\(00\)00232-6](https://doi.org/10.1016/S0031-9422(00)00232-6)
- Ono NN, Qin XQ, Wilson AE, Li G, Tian L (2016) Two UGT84 family glycosyltransferases catalyze a critical reaction of hydrolyzable tannin biosynthesis in pomegranate (*Punica granatum*). *PLoS ONE* 11:e0156319. <https://doi.org/10.1371/journal.pone.0156319>
- Pang Y, Peel GJ, Sharma SB, Tang Y, Dixon RA (2008) A transcript profiling approach reveals an epicatechin-specific glucosyltransferase expressed in the seed coat of *Medicago truncatula*. *Proc Natl Acad Sci USA* 105:14210–14215. <https://doi.org/10.1073/pnas.0805954105>
- Sasaki N, Nishizaki Y, Yamada E, Tatsuzawa F, Nakatsuka T, Takahashi H, Nishihara M (2015) Identification of the glucosyltransferase that mediates direct flavone C-glucosylation in *Gentiana triflora*. *FEBS Lett* 589:182–187. <https://doi.org/10.1016/j.febslet.2014.11.045>
- Schulenburg K, Feller A, Hoffmann T, Schecker JH, Martens S, Schwab W (2016) Formation of  $\beta$ -glucogallin, the precursor of ellagic acid in strawberry and raspberry. *J Exp Bot* 67:2299–2308. <https://doi.org/10.1093/jxb/erw036>
- Singh SA, Christendat D (2006) Structure of Arabidopsis dehydroquinone dehydratase-shikimate dehydrogenase and implications for metabolic channeling in the shikimate pathway. *Biochemistry* 45:7787–7796. <https://doi.org/10.1021/bi060366+>
- Speckaert N, Adamou NM, Hassane HA, Baldacci-Cresp F, Mol A, Goeminne G, Boerjan W, Duez P, Hawkins S, Neutelings G, Hoffmann T, Schwab W, El Jaziri M, Behr M, Baucher M (2020) Characterization of the UDP-glycosyltransferase UGT72 family in poplar and identification of genes involved in the glycosylation of monolignols. *Int J Mol Sci* 21. <https://doi.org/10.3390/ijms21145018>
- Sun G, Streb M, Merz M, Blumberg R, Huang FC, McGraphery K, Hoffmann T, Schwab W (2019) Glucosylation of the phytoalexin *N*-feruloyl tyramine modulates the levels of pathogen-responsive metabolites in *Nicotiana benthamiana*. *Plant J* 100:20–37. <https://doi.org/10.1111/tpj.14420>
- Tahara K, Nishiguchi M, Frolov A, Mittasch J, Milkowski C (2018) Identification of UDP glucosyltransferase from the aluminum-resistance tree *Eucalyptus camaldulensis* forming  $\beta$ -glucogallin, the precursor of hydrolyzable tannins. *Phytochemistry* 152:154–161. <https://doi.org/10.1016/j.phytochem.2018.05.005>
- Tahara K, Nishiguchi M, Funke E, Miyazawa S, Miyama T, Milkowski C (2021) Dehydroquinone dehydratase/shikimate dehydrogenases involved in gallate biosynthesis of the aluminum-tolerant tree species *Eucalyptus camaldulensis*. *Planta* 253:3. <https://doi.org/10.1007/s00425-020-03516-w>
- Witte S, Moco S, Vervoort J, Matern U, Martens S (2009) Recombinant expression and functional characterisation of regio-specific flavonoid glucosyltransferases from *Hieracium pilosella* L. *Planta* 229:1135–1146. <https://doi.org/10.1007/s00425-009-0902-x>
- Yang M, Fehl C, Lees KV, Lim E-K, Offen WA, Davies GJ, Bowles DJ, Davidson MG, Roberts SJ, Davis BG (2018) Functional and informatics analysis enables glycosyltransferase activity prediction. *Nat Chem Biol* 14:1109–1117. <https://doi.org/10.1038/s41589-018-0154-9>
- Yin QG, Shen GA, Chang ZZ, Tang YH, Gao HW, Pang YZ (2017) Involvement of three putative glucosyltransferases from the UGT72 family in flavonol glucoside/rhamnoside biosynthesis in *Lotus japonicus* seeds. *J Exp Bot* 68:594–609. <https://doi.org/10.1093/jxb/erw420>
- Yin QG, Shen GA, Di SK, Fan CY, Chang ZZ, Pang YZ (2017) Genome-wide identification and functional characterization of UDP-glucosyltransferase genes involved in flavonoid biosynthesis in *Glycine max*. *Plant Cell Physiol* 58:1558–1572. <https://doi.org/10.1093/pcp/pcx081>
- Zhao X, Dai X, Gao L, Guo L, Zhuang J, Liu Y, Ma X, Wang R, Xia T, Wang Y (2017) Functional analysis of an uridine diphosphate glycosyltransferase involved in the biosynthesis of polyphenolic glucoside in tea plants (*Camellia sinensis*). *J Agric Food Chem* 65:10993–11001. <https://doi.org/10.1021/acs.jafc.7b04969>
